# Supplementary material for: Digital spatial profiling of the microenvironment of muscle invasive bladder cancer
Source: PubMed Central journal article supplement (PMC11189454; doi:10.1038/s42003-024-06426-9), 2024-06-18
Supplement: 42003_2024_6426_MOESM3_ESM.pdf [file 42003_2024_6426_MOESM3_ESM.pdf]

## Description of Additional Supplementary Files

**File name:** Supplementary Data

**Description:** Supplementary data consisting of raw, normalized and log2 count data, annotation file, ROI region and subtype differentially expressed gene results, cell profile matrix for cell deconvolution, and R analysis script.
